# Supplementary material
Source: Royal Society of Chemistry journal article supplement (doi:10.1039/d6nr01084a)
Supplement: d6nr01084a1.pdf [file d6nr01084a1.pdf]

## Supplementary Information

### **Improving the high initial Coulombic efficiency of manganese oxide anodes: A strategy for in-situ construction of an interface of metal-organic framework-derived oxide nanoparticles**

Muying Sun \*\*, Siyuan Yin \*\*, Song Li \*, Hongsheng Mi, Zhongsheng Wen,  
Juncai Sun

Institute of Materials and Technology, College of Transportation  
Engineering, Dalian Maritime University, Dalian 116026, China

\* Corresponding author. E-mail: [lisong@dlmu.edu.cn](mailto:lisong@dlmu.edu.cn) (S. Li).

\*\* These authors contributed to the work equally and should be regarded as  
co-first authors.

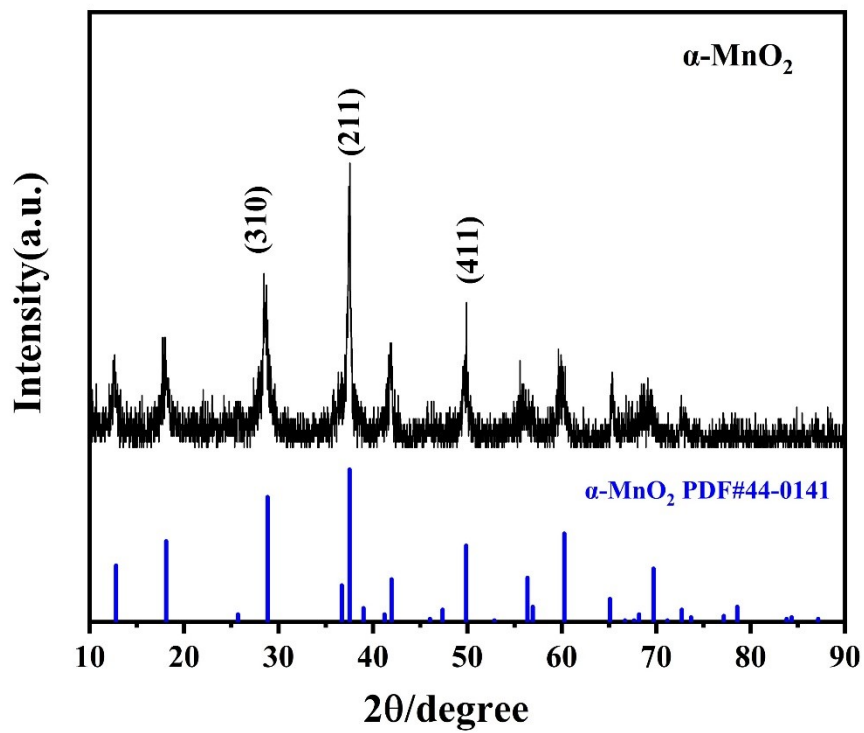

Fig. S1. XRD patterns of  $\alpha$ - $\text{MnO}_2$ .

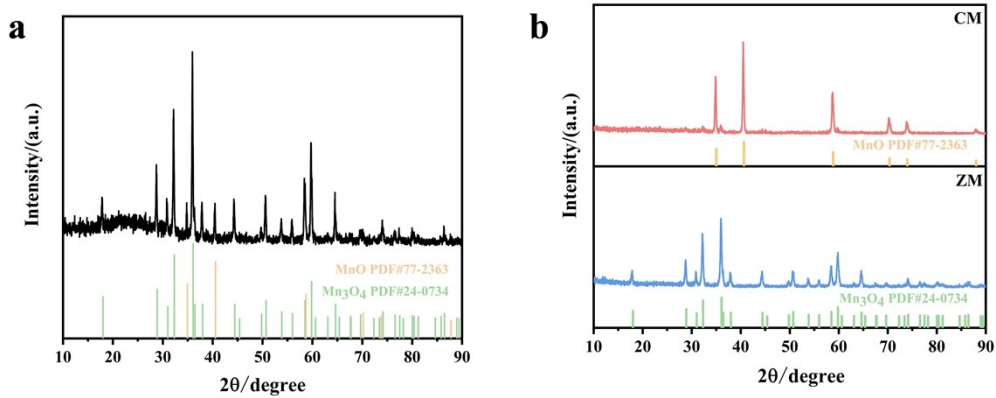

Fig. S2. XRD patterns of the calcined  $\text{MnO}_2$  (a), CM and ZM(b).

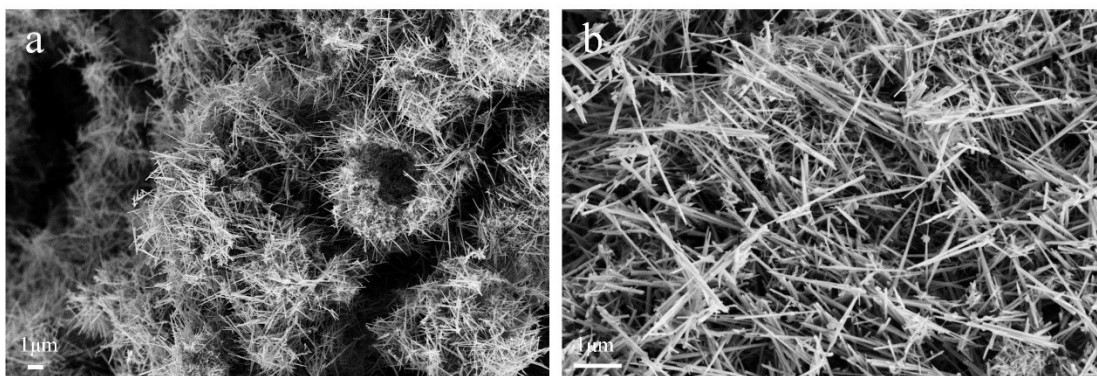

Fig. S3. SEM images of  $\alpha$ -MnO<sub>2</sub>.

| Element | Sample element content W (%) |
|---------|------------------------------|
| Co      | 3.757%                       |
| Zn      | 5.507%                       |
| Mn      | 47.645%                      |

Table S1. ICP test of Co, Zn and Mn.

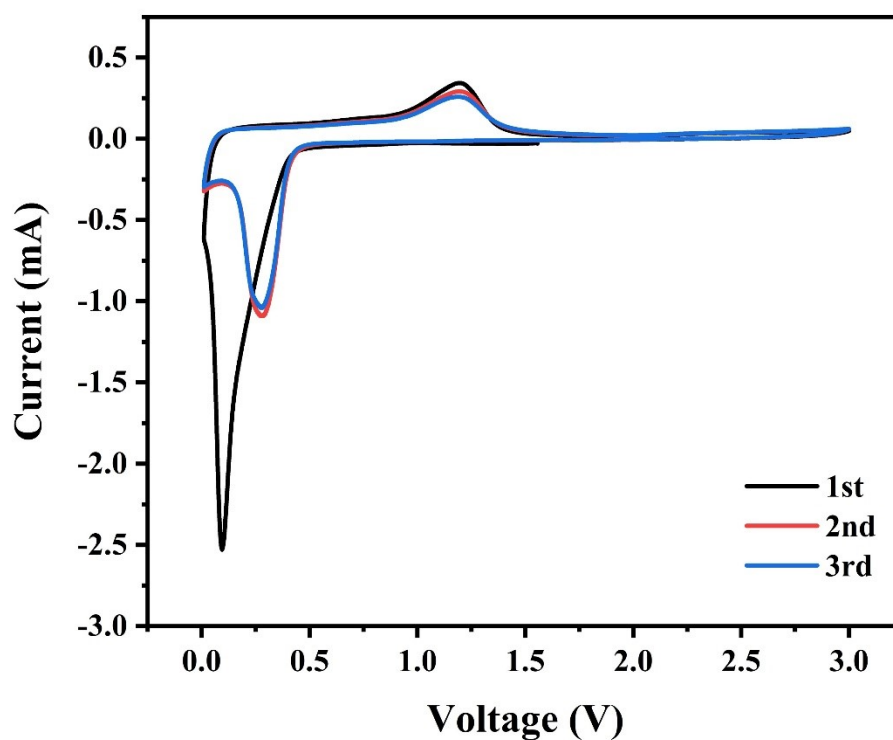

Fig. S4. CV curves between 0.01 and 3 V at a potential sweep rate of 0.1 mV s<sup>-1</sup> for the  $\alpha$ -MnO<sub>2</sub> electrodes.

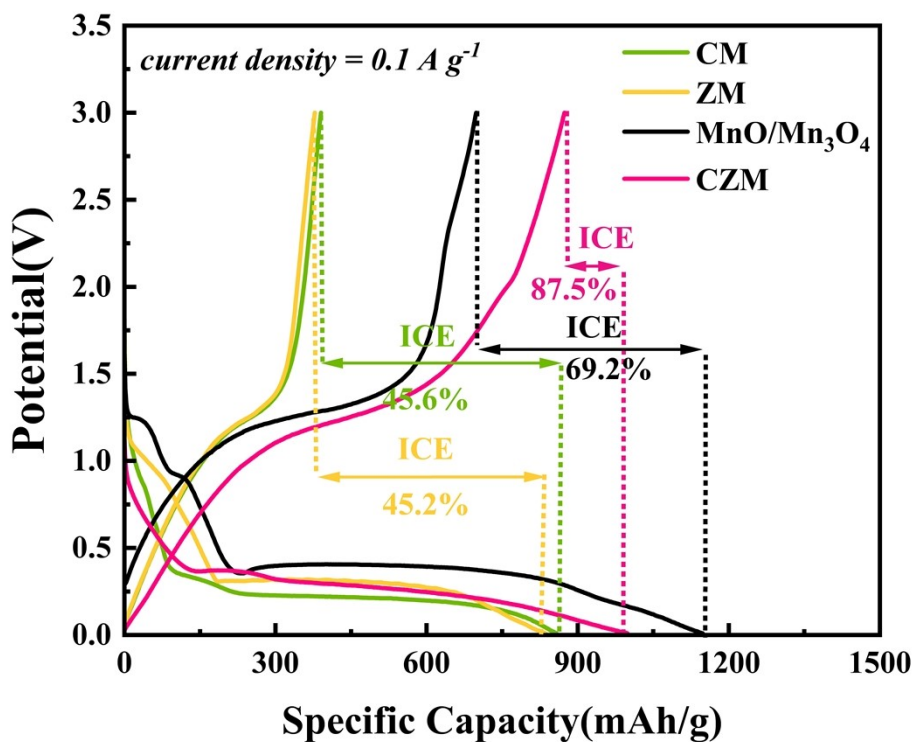

Fig. S5. Voltage profiles for the MnO/Mn<sub>3</sub>O<sub>4</sub>, CM and ZM electrodes during the initial charge-discharge cycle at  $0.1 \text{ A g}^{-1}$ .

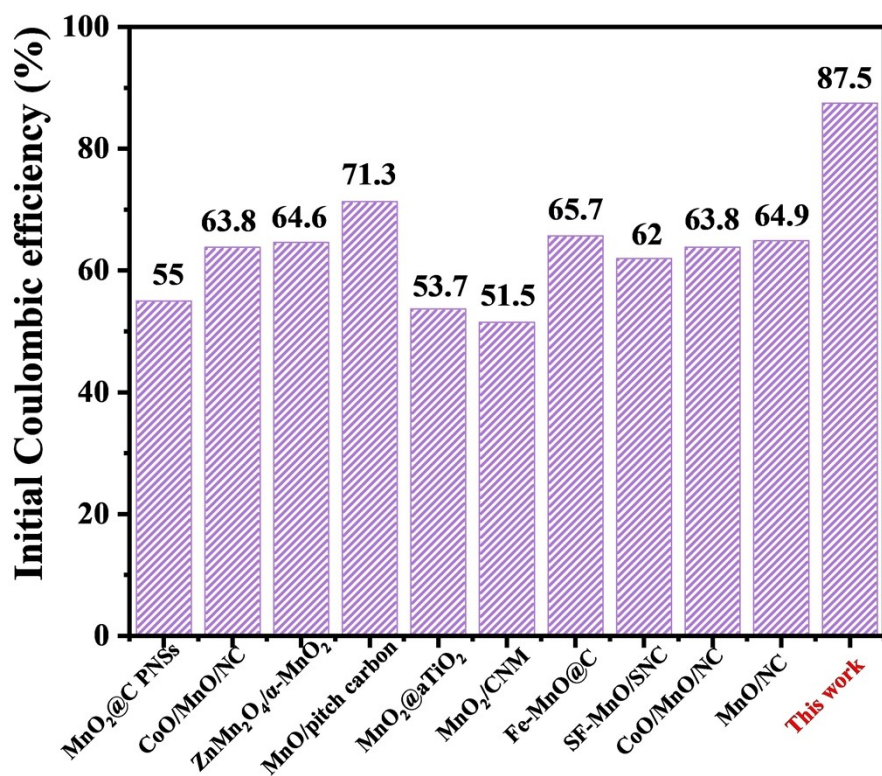

Fig. S6. Comparison of the initial Coulombic efficiency between this work and previously reported manganese-based anodes.

| Sample           | $R_s(\Omega)$ | $R_{ct}(\Omega)$ |
|------------------|---------------|------------------|
| MnO <sub>2</sub> | 15.76         | 220.7            |
| CZM              | 3.428         | 148.3            |

Table S2. The  $R_s$  and  $R_{ct}$  of MnO<sub>2</sub> and CZM sample.

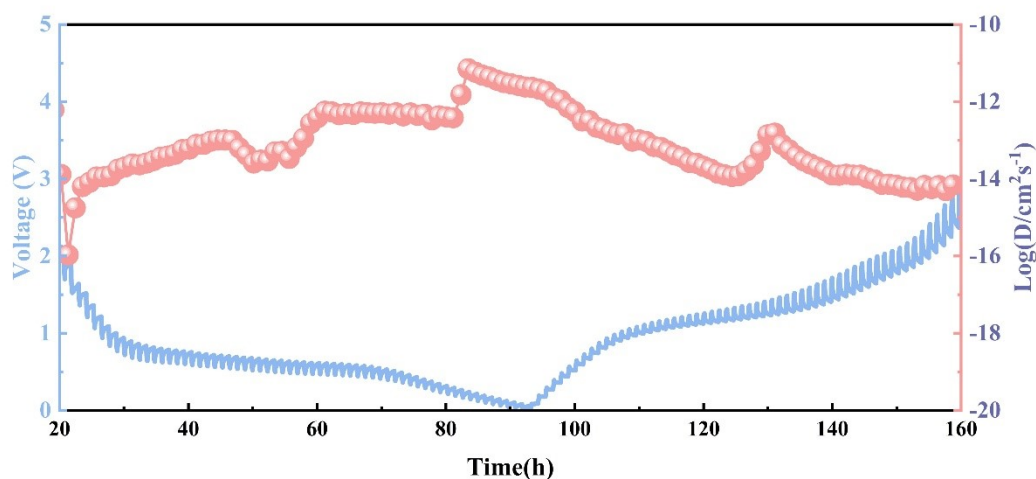

Fig. S7. GITT curves and corresponding  $D_{Li^+}$  of MnO<sub>2</sub> electrode.

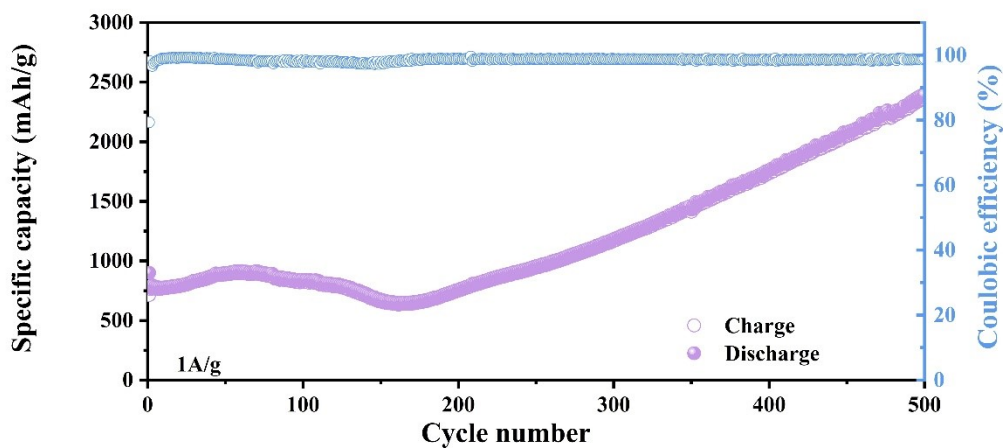

Fig. S8. Long-term cycle performance in the voltage range of 0.01 – 3.0 V at 1 A g<sup>-1</sup> of the CZM electrodes.

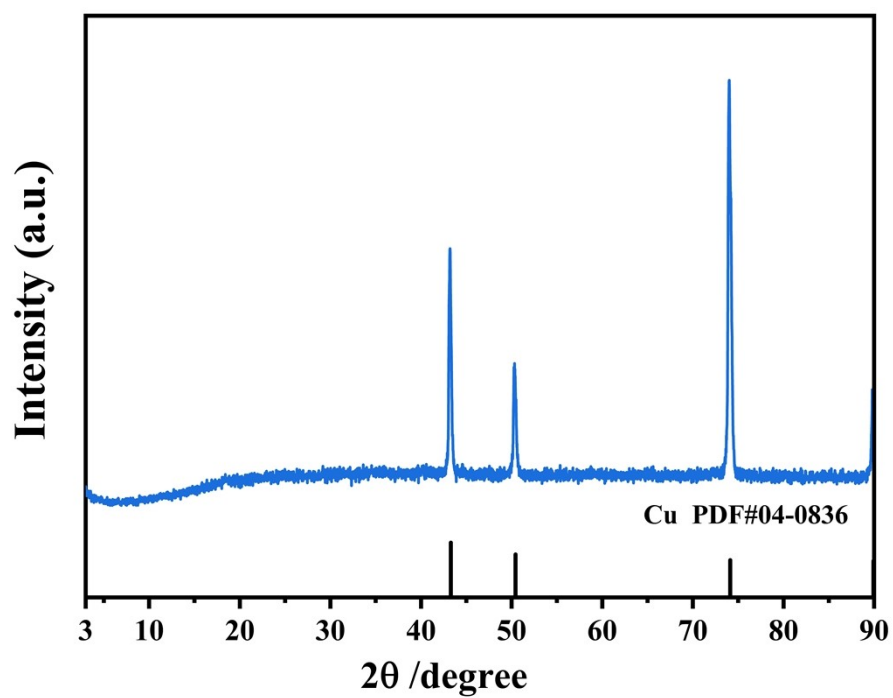

Fig. S9. XRD patterns of the CZM electrode after 30th cycle.

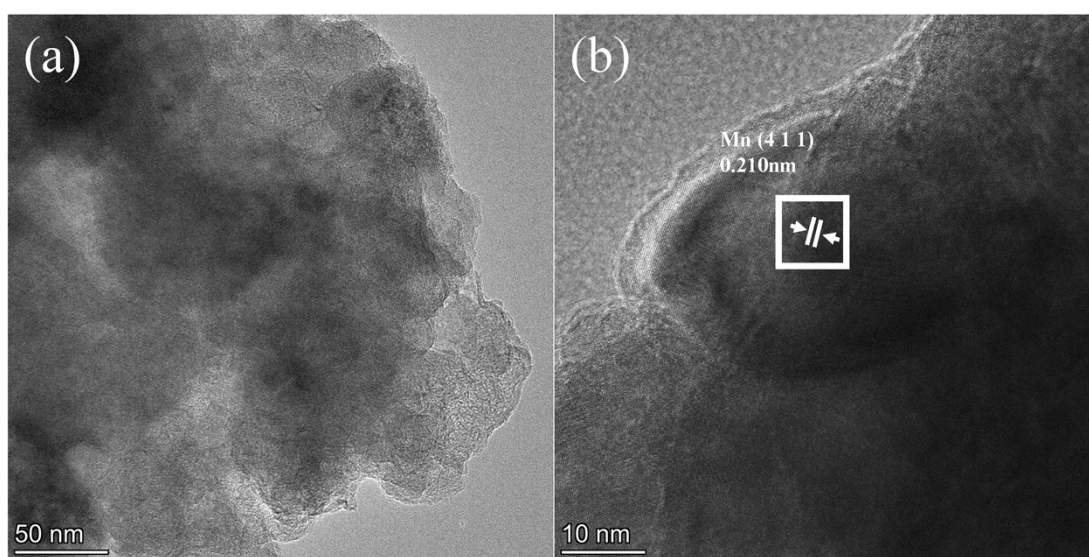

Fig. S10. (a)The TEM images of CZM electrode after 30th cycle. (b) HRTEM images of CZM electrode after 30th cycle.
